# Supplementary material for: Human Beta-Defensin 2 and 3 Inhibit HIV-1 Replication in Macrophages
Source: PubMed Central journal article supplement (PMC8281893; doi:10.3389/fcimb.2021.535352), 2021-07-01
Supplement: DataSheet_1.pdf [file DataSheet_1.pdf]

A

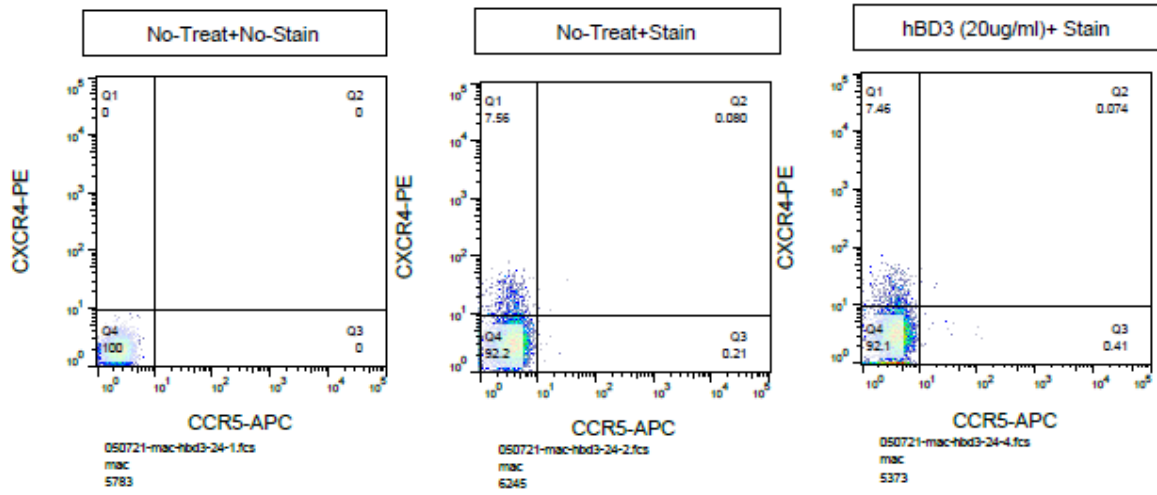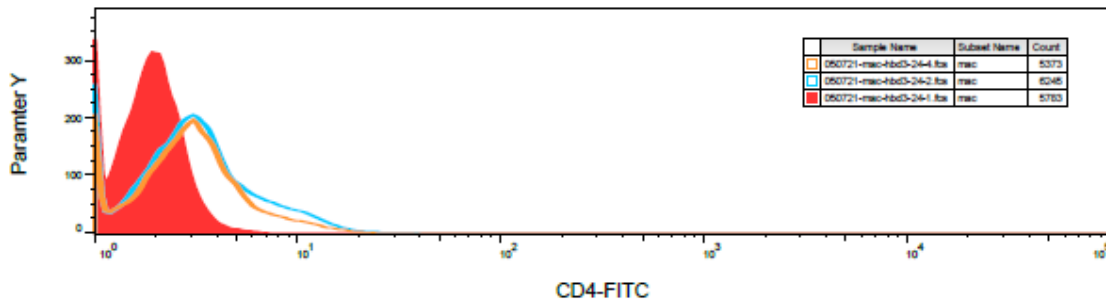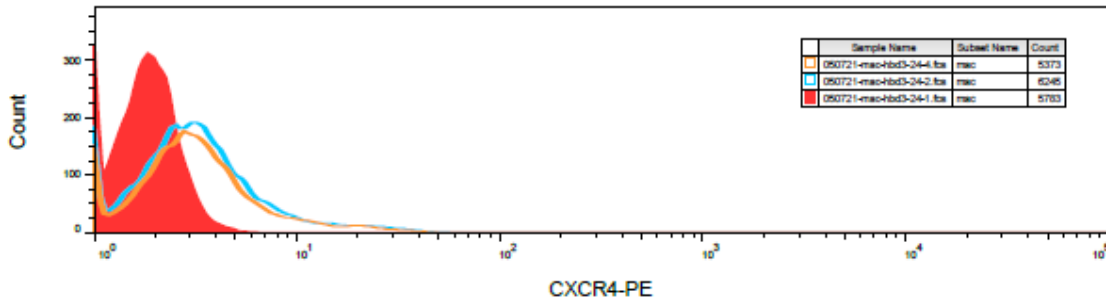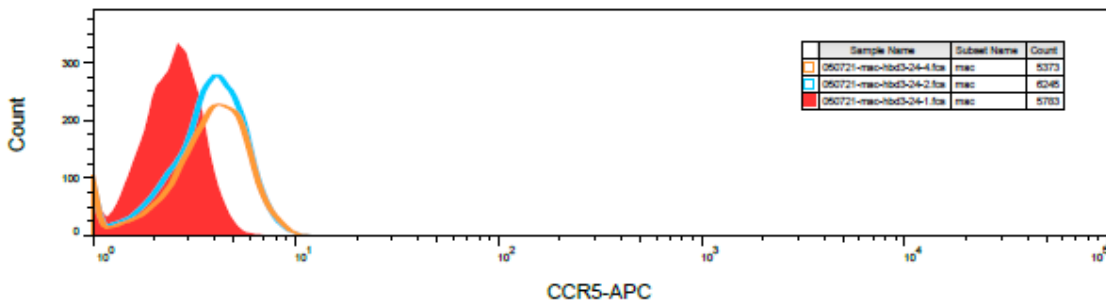

B

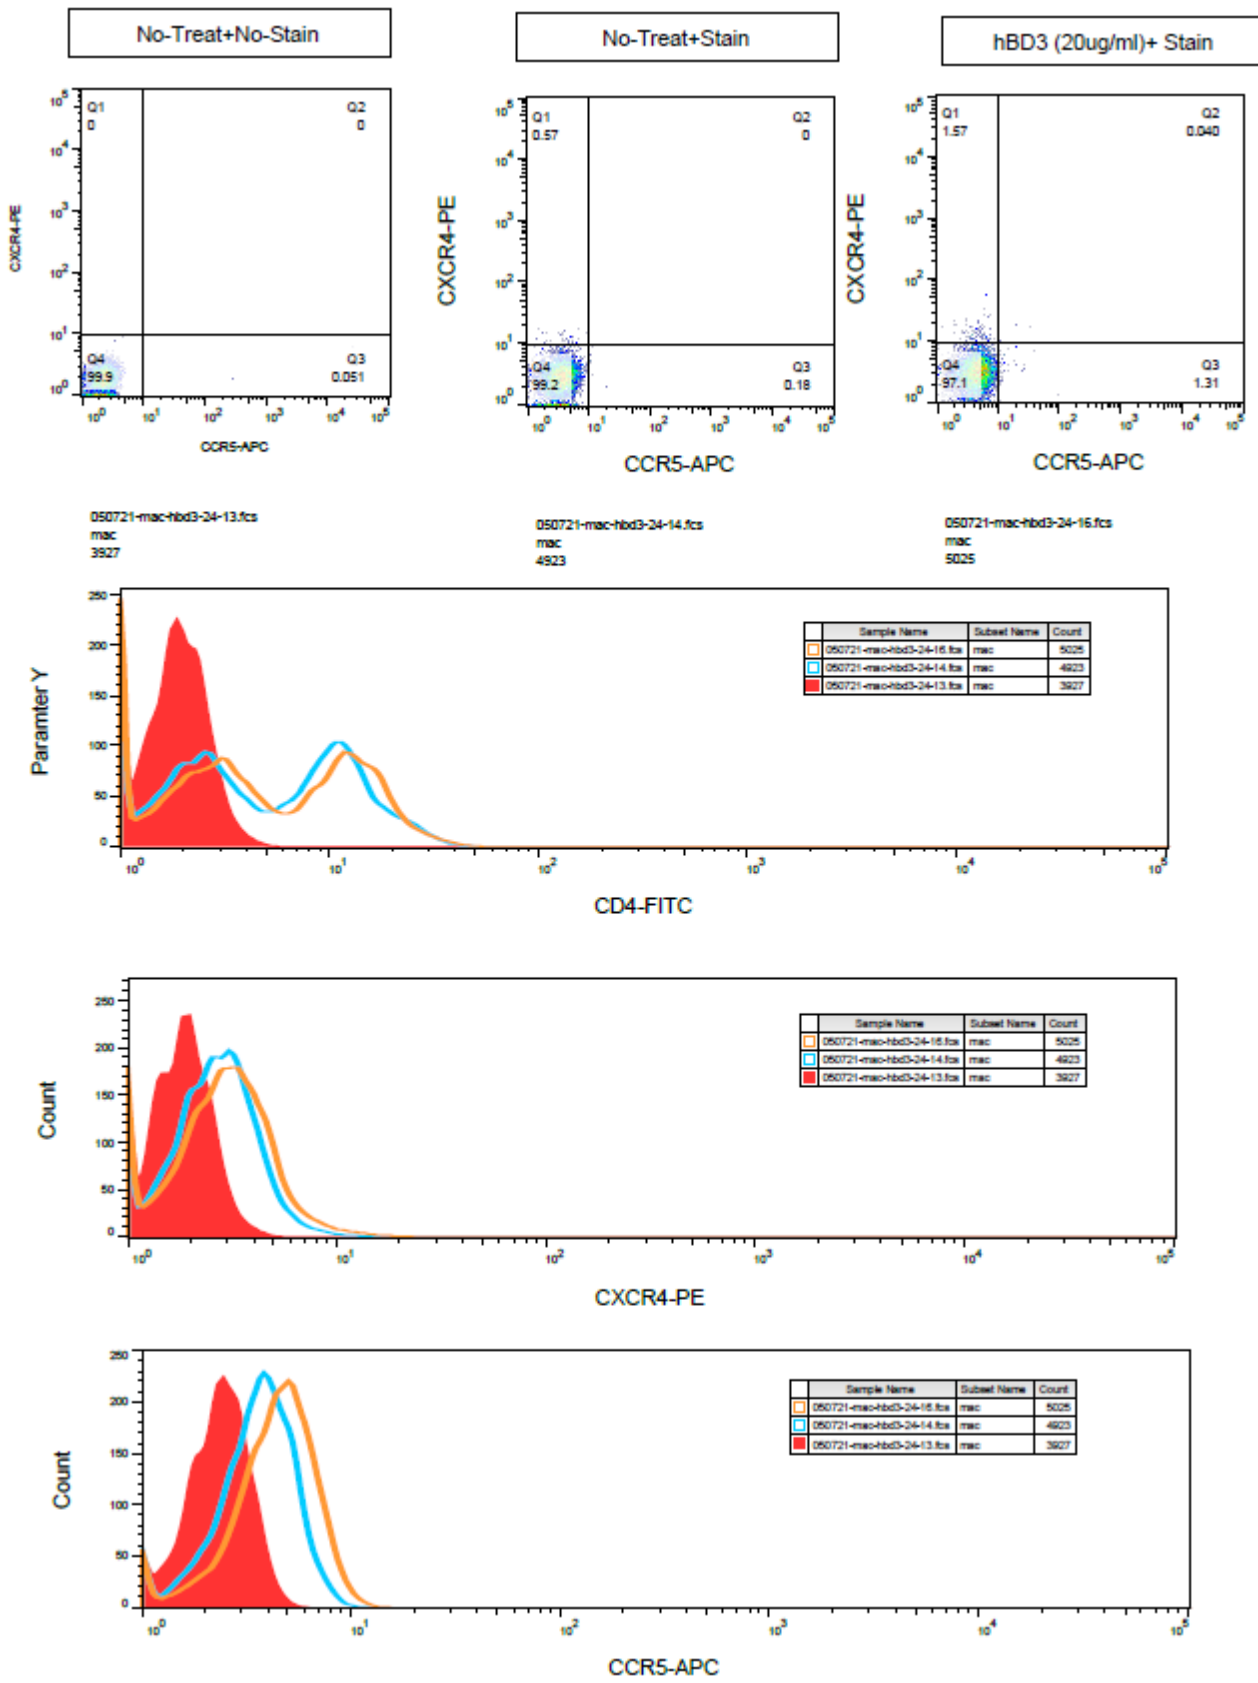

**Supplemental Figure S1. hBD3 does not induce modulation of HIV receptors on the surface of MDM.** MDMs were treated with hBD3 (4.7 $\mu$ M); 1, 2, 3 and 24 hours after treatment cells were analyzed for CD4, CCR5, CXCR4 expression by flow cytometry. Shown are the results of a representative experiment from one of 2 donors, 1 hour (A) and 24 hours (B) after treatment. In red, unstained cells. In blue, cells stained with the antibody as indicated below the graph; in orange, hBD2-treated cells.

**A**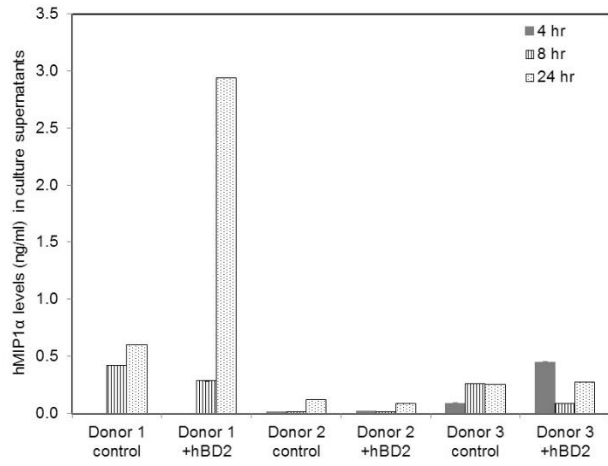**B**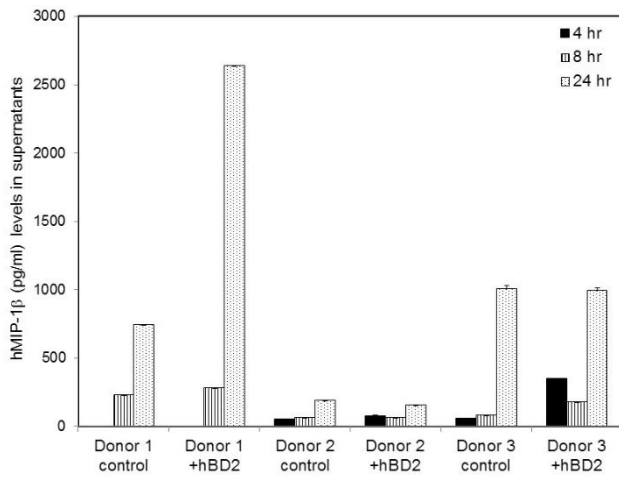**C**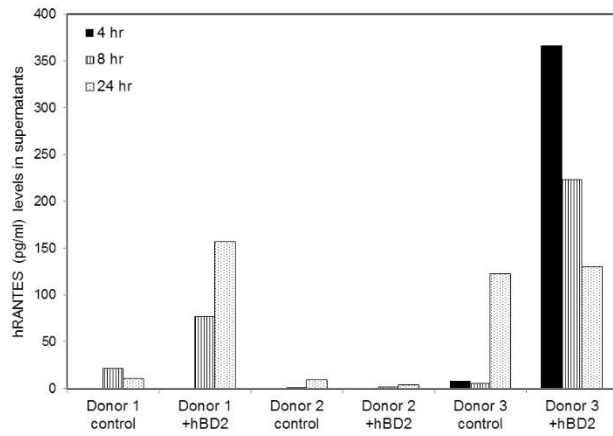

**Supplemental Figure S2. hBD2 does not induce expression of anti-viral cytokines or  $\beta$ -chemokines in macrophages.** Culture supernatants from MDM treated with hBD2 were collected at times indicated and  $\beta$ -chemokines MIP-1 $\alpha$  (A), MIP-1 $\beta$  (B), and RANTES (C) were quantified using commercial ELISA kits. Data are presented as average  $\pm$  SEM of duplicates for independent experiments from 3 different donors.

1

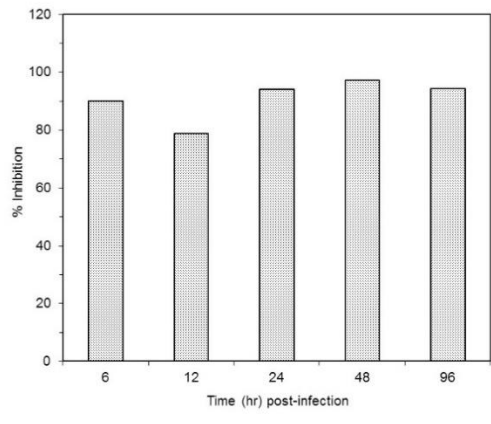

2

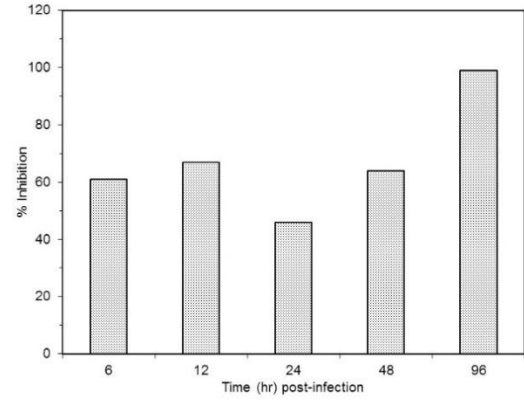

3

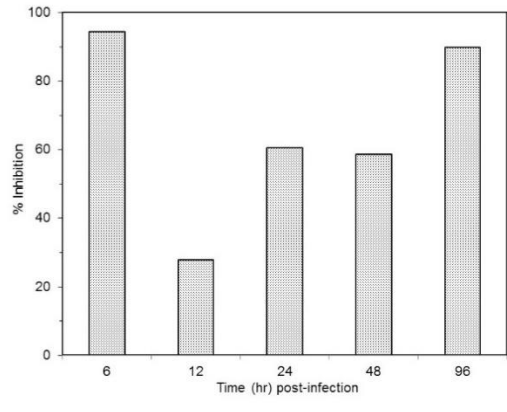

4

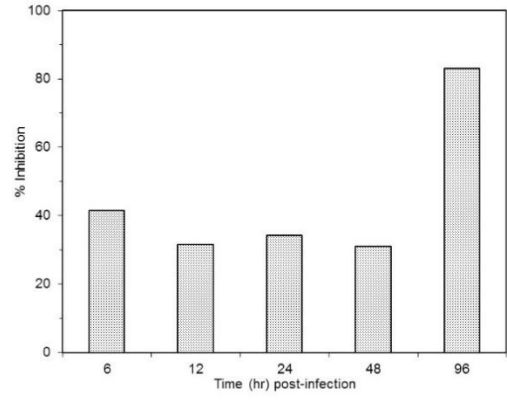

**Supplemental Figure S3. hBD2 inhibits accumulation of early reverse transcription products of HIV-1.** Inhibition for the four donors shown in Figure 3B was determined as the percentage of HIV-1 DNA copies in treated infected cells in reference to untreated infected cells.
